# Supplementary material for: PARK2 Mutation Causes Metabolic Disturbances and Impaired Survival of Human iPSC-Derived Neurons
Source: PubMed Central journal article supplement (PMC6624735; doi:10.3389/fncel.2019.00297), 2019-07-05
Supplement: Data_Sheet_1.pdf [file Data_Sheet_1.pdf]

## Supplemental Information

**Fig. S1: Midbrain dopaminergic differentiation of *PARK2* KO and isogenic control neuronal cultures.** (A-D) qRT-PCR analysis for mRNA levels, normalised to glyceraldehyde 3-phosphate dehydrogenase (GAPDH) show (A) down-regulation of the pluripotency marker OCT4 and upregulation of the midbrain dopaminergic markers (B) homeobox protein engrailed-1 (EN1), (C) LIM homeobox transcription factor 1  $\alpha$  (LMX1A), and (D) G protein-activated inward rectifier potassium channel 2 (GIRK2). Mean  $\pm$  SEM, n = 4, data from 2 independent differentiations, \*\*P<0.01, \*\*\*P<0.005, one-way ANOVA with Tukey's Multiple Comparison test.

**Fig. S2: Western blotting for BAX and Drp1.** (A) Western blotting using samples from 3 independent differentiations showing large variation in expression of BAX with a marked decreased in *PARK2* KO neurons compared to control in one differentiation. (B) Western blotting showed similar levels of Drp1 in control and *PARK2* KO neurons. Expression levels were normalized to  $\beta$ -actin and shown relative to control neurons. Mean  $\pm$  SEM, n = 3 independent differentiations.

**Fig. S3: Pathway analysis identified changes in glycolysis and lactate-pyruvate metabolism in *PARK2* KO neurons.** Simplified schematic showing the glycolysis and pyruvate-lactate pathways with the down-regulated proteins in blue: fructose-bisphosphate aldolase C (ALDOC), pyruvate kinase PKM (PKM), lactate dehydrogenase B (LDHB) and monocarboxylase transporter 1 (MCT1).

**Fig. S4: Mitochondrial morphology analysis.** (A, C) Immunofluorescence staining of control and *PARK2* KO neurons on differentiation day 25 for mitochondrial import receptor subunit TOM20 (red) and nuclei (DAPI, blue). (B, D) Binary images of all TOM20+ mitochondria between 0.15-3.50  $\mu\text{m}^2$  in size. (E, G) Large, elongated mitochondria between 0.71-3.50  $\mu\text{m}^2$  with circularity of 0.01-0.50. (F, H) Large, round mitochondria between 0.71-3.50  $\mu\text{m}^2$  with circularity of 0.50-1.00. (I, K) Small, elongated mitochondria between 0.15-0.70  $\mu\text{m}^2$  with circularity of 0.01-0.50. (J, L) Small, round mitochondria between 0.15-0.70  $\mu\text{m}^2$  with circularity of 0.50-1.00.

**Table S1:** Table listing (A) all the significantly regulated proteins in the proteomic analysis, (B) all the significantly regulated mitochondrial proteins in the proteomic analysis, and (C) all the mitochondrial proteins with phosphorylation changes in the proteomic analysis.

**Table S2:** Table listing the electron transport chain complex IV proteins identified by the proteomic analysis with the ratio of protein levels in *PARK2* KO neurons compared to controls, p-value based on Student's T-test and number of unique peptides, n = 3 independent differentiations.

**Table S3:** Table listing the electron transport chain complex I proteins identified by the proteomic analysis with the ratio of protein levels in *PARK2* KO neurons compared to controls, p-value based on Student's T-test and number of unique peptides, n = 3 independent differentiations.

**Table S4:** Table listing the electron transport chain complex III proteins identified by the proteomic analysis with the ratio of protein levels in *PARK2* KO neurons compared to

controls, p-value based on Student's T-test and number of unique peptides,  $n = 3$  independent differentiations.

1 Fig. S1

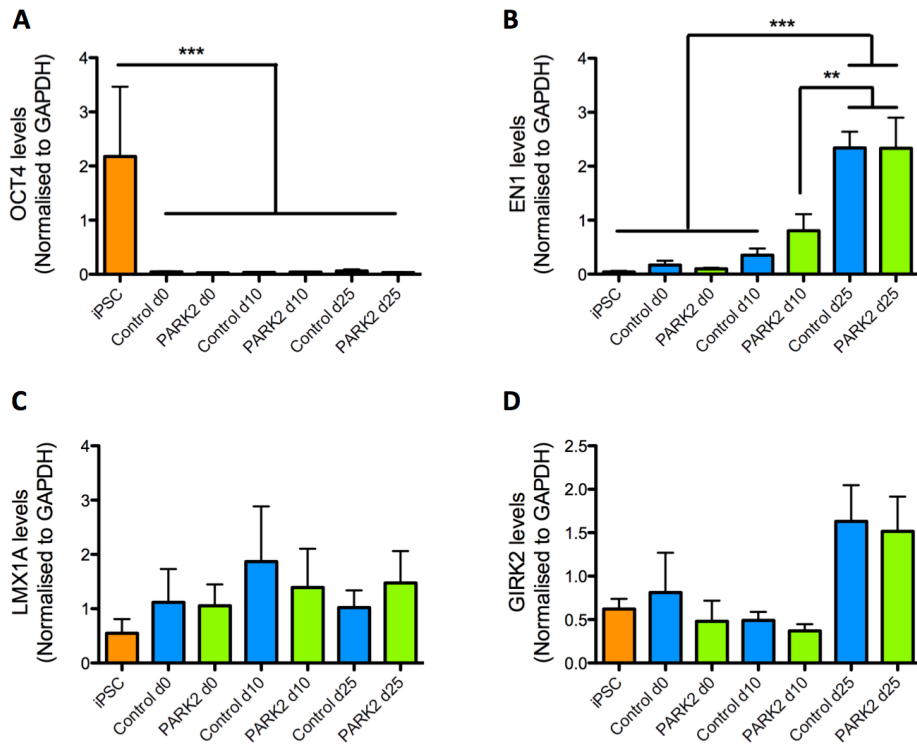

1 Fig. S2

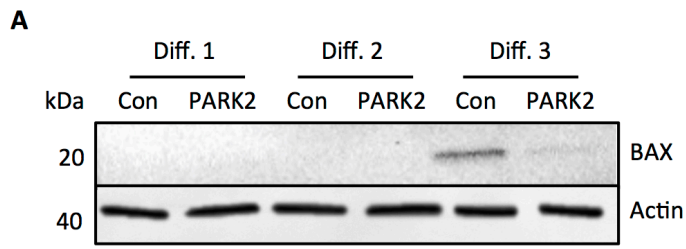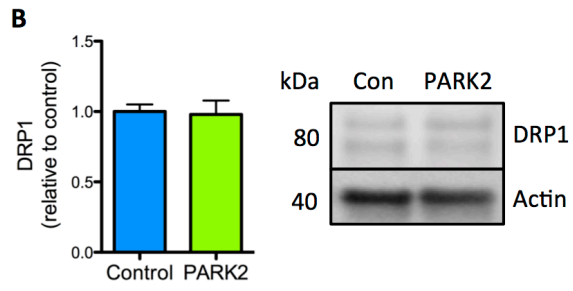

1 Fig. S3

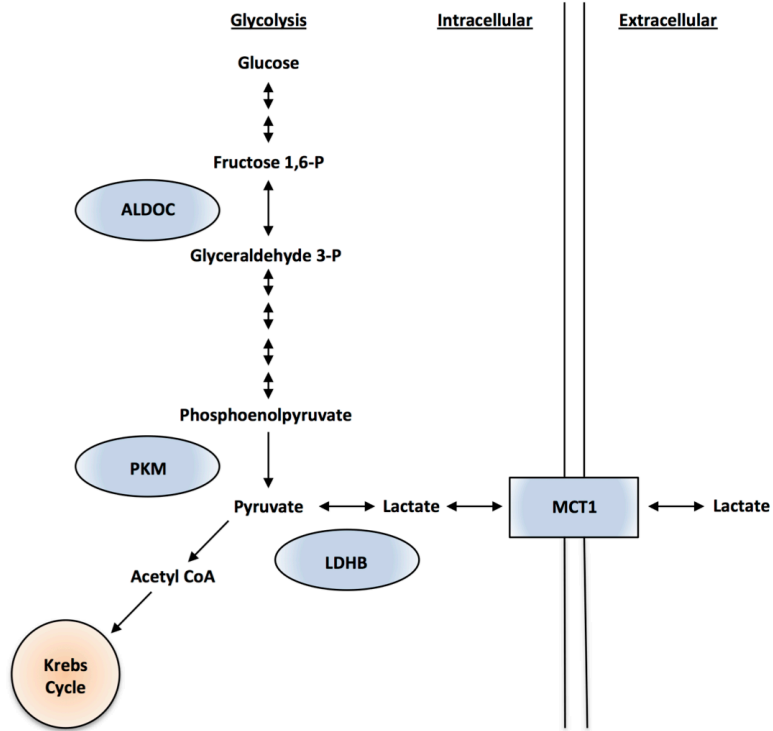

1 Fig. S4

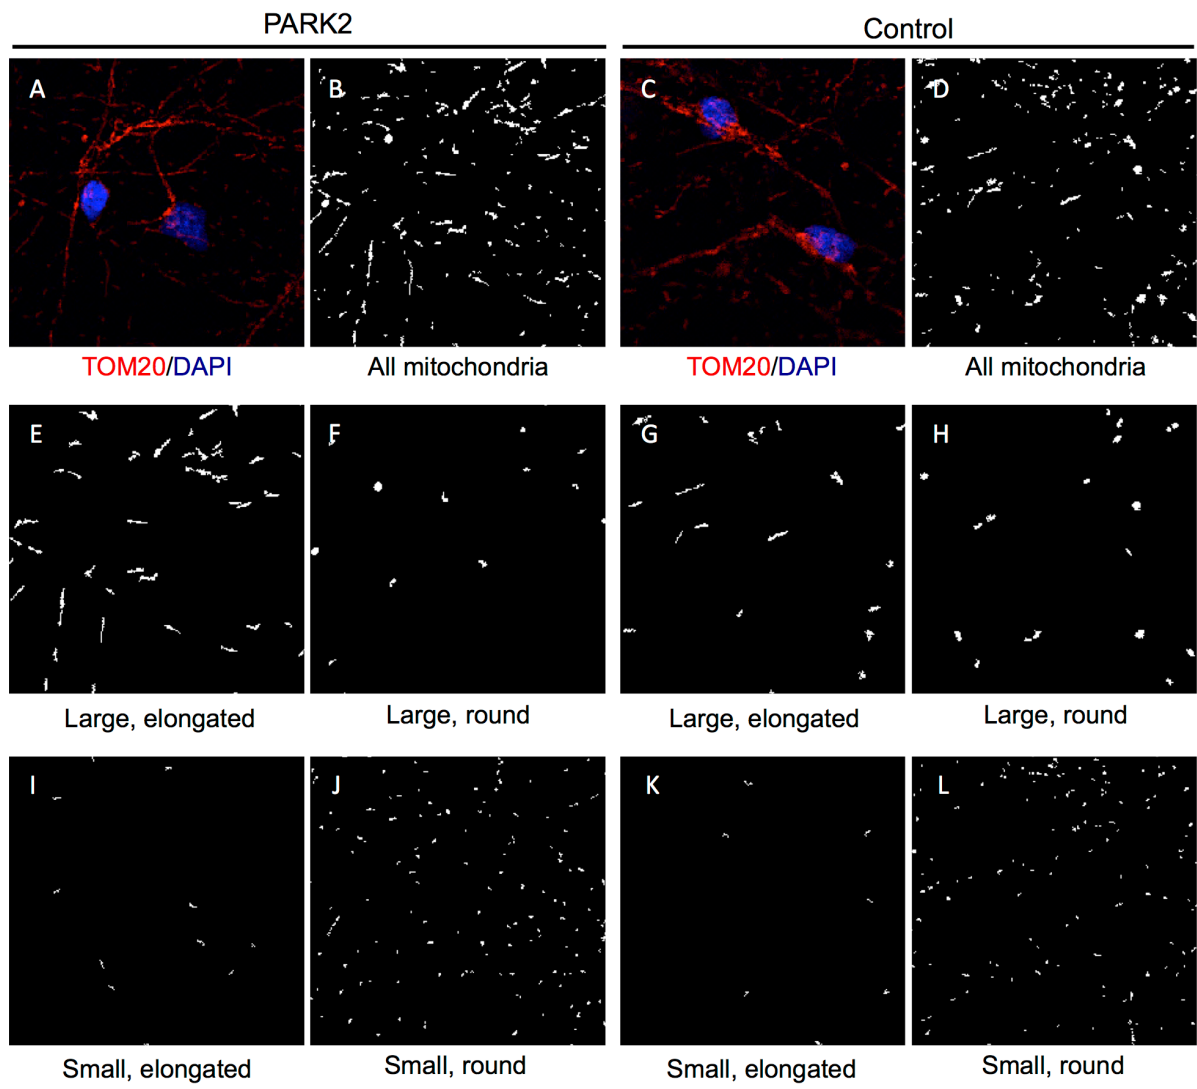

1 **Table S2****Complex IV proteins**

| Accession     | Gene name    | Description                                           | PARK2 / Control | P-value      |
|---------------|--------------|-------------------------------------------------------|-----------------|--------------|
| Q9GZY4        | COA1         | Cytochrome c oxidase assembly factor 1 homolog        | 0,858           | 0,115        |
| Q9Y2R0        | COA3         | Cytochrome c oxidase assembly factor 3 homolog        | 0,97            | 0,177        |
| <b>Q86WW8</b> | <b>COA5</b>  | <b>Cytochrome c oxidase assembly factor 5</b>         | <b>0,76</b>     | <b>0,042</b> |
| <b>Q5JTJ3</b> | <b>COA6</b>  | <b>Cytochrome c oxidase assembly factor 6 homolog</b> | <b>0,76</b>     | <b>0,015</b> |
| <b>Q96BR5</b> | <b>COA7</b>  | <b>Cytochrome c oxidase assembly factor 7</b>         | <b>0,767</b>    | <b>0,012</b> |
| P00395        | COX1         | Cytochrome c oxidase subunit 1                        | 1,342           | 0,078        |
| Q96I36        | COX14        | Cytochrome c oxidase assembly protein COX14           | 0,901           | 0,113        |
| Q7KZN9        | COX15        | Cytochrome c oxidase assembly protein COX15           | 1,177           | 0,165        |
| <b>Q14061</b> | <b>COX17</b> | <b>Cytochrome c oxidase copper chaperone</b>          | <b>0,67</b>     | <b>0,013</b> |
| Q8N8Q8        | COX18        | Cytochrome c oxidase assembly protein COX18           | 1,126           | 0,335        |
| P00403        | COX2         | Cytochrome c oxidase subunit 2                        | 0,972           | 0,429        |
| Q5RI15        | COX20        | Cytochrome c oxidase assembly protein COX20           | 1,122           | 0,181        |
| P13073        | COX4I1       | Cytochrome c oxidase subunit 4 isoform 1              | 0,977           | 0,152        |
| P20674        | COX5A        | Cytochrome c oxidase subunit 5A                       | 1,119           | 0,293        |
| P10606        | COX5B        | Cytochrome c oxidase subunit 5B                       | 0,925           | 0,160        |
| P12074        | COX6A1       | Cytochrome c oxidase subunit 6A1                      | 1,104           | 0,219        |
| P14854        | COX6B1       | Cytochrome c oxidase subunit 6B1                      | 0,983           | 0,217        |
| P09669        | COX6C        | Cytochrome c oxidase subunit 6C                       | 1,059           | 0,194        |
| P14406        | COX7A2       | Cytochrome c oxidase subunit 7A2                      | 1,000           | 0,358        |
| O14548        | COX7A2L      | Cytochrome c oxidase subunit 7A-related protein       | 0,912           | 0,241        |
| P24311        | COX7B        | Cytochrome c oxidase subunit 7B                       | 0,912           | 0,241        |
| P15954        | COX7C        | Cytochrome c oxidase subunit 7C                       | 1,029           | 0,274        |
| P99999        | CYCS         | Cytochrome c                                          | 0,844           | 0,321        |
| P53701        | HCCS         | Cytochrome c-type heme lyase                          | 0,996           | 0,361        |
| O00483        | NDUFA4       | Cytochrome c oxidase subunit NDUFA4                   | 0,952           | 0,210        |

1 **Table S3**  
**Complex I proteins**

| Accession | Gene name | Description                                             | PARK2 / Control | P-value |
|-----------|-----------|---------------------------------------------------------|-----------------|---------|
| O95299    | NDUFA10   | NADH dehydrogenase 1 alpha subcomplex subunit 10        | 1,094           | 0,397   |
| Q86Y39    | NDUFA11   | NADH dehydrogenase 1 alpha subcomplex subunit 11        | 1,152           | 0,239   |
| Q9UI09    | NDUFA12   | NADH dehydrogenase 1 alpha subcomplex subunit 12        | 1,127           | 0,341   |
| Q9P0J0    | NDUFA13   | NADH dehydrogenase 1 alpha subcomplex subunit 13        | 0,968           | 0,264   |
| O43678    | NDUFA2    | NADH dehydrogenase 1 alpha subcomplex subunit 2         | 1,05            | 0,362   |
| O95167    | NDUFA3    | NADH dehydrogenase 1 alpha subcomplex subunit 3         | 1,336           | 0,088   |
| Q16718    | NDUFA5    | NADH dehydrogenase 1 alpha subcomplex subunit 5         | 1,109           | 0,356   |
| P56556    | NDUFA6    | NADH dehydrogenase 1 alpha subcomplex subunit 6         | 1,056           | 0,244   |
| O95182    | NDUFA7    | NADH dehydrogenase 1 alpha subcomplex subunit 7         | 0,921           | 0,247   |
| P51970    | NDUFA8    | NADH dehydrogenase 1 alpha subcomplex subunit 8         | 0,999           | 0,443   |
| Q16795    | NDUFA9    | NADH dehydrogenase 1 alpha subcomplex subunit 9         | 1,076           | 0,436   |
| O14561    | NDUFAB1   | Acyl carrier protein                                    | 1,067           | 0,208   |
| Q9Y375    | NDUFAF1   | Complex I intermediate-associated protein 30            | 1,018           | 0,344   |
| Q8N183    | NDUFAF2   | NADH dehydrogenase 1 alpha subcomplex assembly factor 2 | 1,024           | 0,436   |
| Q9BU61    | NDUFAF3   | NADH dehydrogenase 1 alpha subcomplex assembly factor 3 | 0,94            | 0,444   |
| Q9P032    | NDUFAF4   | NADH dehydrogenase 1 alpha subcomplex assembly factor 4 | 1,033           | 0,426   |
| Q7L592    | NDUFAF7   | Protein arginine methyltransferase NDUFAF7              | 1,061           | 0,354   |
| O75438    | NDUFB1    | NADH dehydrogenase 1 beta subcomplex subunit 1          | 1,02            | 0,317   |
| O96000    | NDUFB10   | NADH dehydrogenase 1 beta subcomplex subunit 10         | 1,141           | 0,184   |
| Q9NX14    | NDUFB11   | NADH dehydrogenase 1 beta subcomplex subunit 11         | 0,977           | 0,446   |
| O95178    | NDUFB2    | NADH dehydrogenase 1 beta subcomplex subunit 2          | 0,958           | 0,421   |
| O43676    | NDUFB3    | NADH dehydrogenase 1 beta subcomplex subunit 3          | 1,058           | 0,289   |
| O95168    | NDUFB4    | NADH dehydrogenase 1 beta subcomplex subunit 4          | 0,982           | 0,273   |
| O43674    | NDUFB5    | NADH dehydrogenase 1 beta subcomplex subunit 5          | 1,035           | 0,378   |
| O95139    | NDUFB6    | NADH dehydrogenase 1 beta subcomplex subunit 6          | 1               | 0,433   |
| P17568    | NDUFB7    | NADH dehydrogenase 1 beta subcomplex subunit 7          | 1,07            | 0,356   |
| O95169    | NDUFB8    | NADH dehydrogenase 1 beta subcomplex subunit 8          | 1,086           | 0,340   |
| Q9Y6M9    | NDUFB9    | NADH dehydrogenase 1 beta subcomplex subunit 9          | 0,989           | 0,266   |
| O43677    | NDUFC1    | NADH dehydrogenase 1 subunit C1                         | 0,961           | 0,286   |
| O95298    | NDUFC2    | NADH dehydrogenase 1 subunit C2                         | 0,941           | 0,292   |
| P28331    | NDUFS1    | NADH-ubiquinone oxidoreductase 75 kDa subunit           | 1,121           | 0,341   |
| O75306    | NDUFS2    | NADH dehydrogenase iron-sulfur protein 2                | 1,108           | 0,424   |
| O75489    | NDUFS3    | NADH dehydrogenase iron-sulfur protein 3                | 1,094           | 0,378   |
| O43181    | NDUFS4    | NADH dehydrogenase iron-sulfur protein 4                | 1,1             | 0,245   |
| O43920    | NDUFS5    | NADH dehydrogenase iron-sulfur protein 5                | 1,022           | 0,293   |
| O75380    | NDUFS6    | NADH dehydrogenase iron-sulfur protein 6,               | 1,018           | 0,293   |
| O75251    | NDUFS7    | NADH dehydrogenase iron-sulfur protein 7                | 1,114           | 0,436   |
| O00217    | NDUFS8    | NADH dehydrogenase iron-sulfur protein 8                | 1,052           | 0,421   |
| P49821    | NDUFV1    | NADH dehydrogenase flavoprotein 1                       | 1,097           | 0,373   |
| P19404    | NDUFV2    | NADH dehydrogenase flavoprotein 2                       | 0,973           | 0,394   |
| P56181    | NDUFV3    | NADH dehydrogenase flavoprotein 3                       | 1,117           | 0,132   |



1 **Table S4**

**Complex III proteins**

| Accession | Gene name | Description                                                | PARK2 / Control | P-value |
|-----------|-----------|------------------------------------------------------------|-----------------|---------|
| P08574    | CYC1      | Cytochrome c1, heme protein,                               | 1,117           | 0,245   |
| Q9NVA1    | UQCC1     | Ubiquinol-cytochrome-c reductase complex assembly factor 1 | 0,998           | 0,211   |
| Q9BRT2    | UQCC2     | Ubiquinol-cytochrome-c reductase complex assembly factor 2 | 1,04            | 0,278   |
| Q6UW78    | UQCC3     | Ubiquinol-cytochrome-c reductase complex assembly factor 3 | 0,847           | 0,095   |
| Q9UDW1    | UQCR10    | Cytochrome b-c1 complex subunit 9                          | 1,094           | 0,384   |
| O14957    | UQCR11    | Cytochrome b-c1 complex subunit 10                         | 1,286           | 0,101   |
| P14927    | UQCRB     | Cytochrome b-c1 complex subunit 7                          | 1,117           | 0,419   |
| P31930    | UQCRC1    | Cytochrome b-c1 complex subunit 1                          | 1,175           | 0,311   |
| P22695    | UQCRC2    | Cytochrome b-c1 complex subunit 2                          | 0,981           | 0,307   |
| P47985    | UQCRFS1   | Cytochrome b-c1 complex subunit Rieske                     | 1,123           | 0,267   |
| P07919    | UQCRH     | Cytochrome b-c1 complex subunit 6                          | 0,925           | 0,163   |
| O14949    | UQCRQ     | Cytochrome b-c1 complex subunit 8                          | 1,119           | 0,247   |

## Supplementary methods

### Propagation of induced pluripotent stem cells (iPSCs)

iPSCs were propagated on Geltrex-coated plates (ThermoFisher) in iPSC medium, conditioned on mouse embryonic fibroblast feeder cells (MEFs, Amsbio) for 24 hrs. iPSC medium consisted of Dulbecco's Modified Eagle Medium (DMEM)/F12 (ThermoFisher) supplemented with 20% Knock-out Serum Replacement (KSR, ThermoFisher), 100  $\mu$ M non-essential amino acids (NEAA, ThermoFisher), 4 mM GlutaMax-1 (ThermoFisher), 4  $\mu$ M 2-Mercaptoethanol (ThermoFisher), 1% penicillin-streptomycin (pen-strep, ThermoFisher), and 4 ng/ml basic fibroblast growth factor (bFGF, R&D Systems). iPSCs were passaged 1:3-6 once a week, using 1 mg/ml collagenase IV (ThermoFisher) for 30 min and medium was changed every day. When thawing, freezing or passaging the iPSCs, ROCK inhibitor (Y27632, Stemgent) was added to promote survival.

### Neural stem cell (NSC) propagation and differentiation

NSCs were propagated on Geltrex-coated plates in Neurobasal Medium (ThermoFisher) supplemented with NEAA, GlutaMax-I, B27 supplement (ThermoFisher), pen-strep, and bFGF. NSCs were passaged 1:3 when 80-90% confluent, by dissociating the cells for 5 min with accutase (ThermoFisher).

For differentiation, NSCs were seeded onto poly-L-ornithine- (Sigma) and laminin-coated (ThermoFisher) plates at a density of 50,000 cells/cm<sup>2</sup>. DOPA Induction Medium (XCell Science) with addition of DOPA Induction Supplement A, B and C (XCell Science), and 200 ng/ml human recombinant sonic hedgehog (Peprotech) was added every other day for the first 9 days of differentiation. Cells were passaged using accutase for 5 min at day 5 and 10, counted using a hemocytometer and plated at a density of 50,000 cells/cm<sup>2</sup> unless otherwise specified. At day 10, the medium was changed to DOPA Maturation Medium (XCell Science) with DOPA Maturation Supplement A (XCell Science) until day 15 and DOPA Maturation Supplement B (XCell Science) hereafter. The resulting neurons were applied in assays from day 25 on unless otherwise stated.

### Quantitative real time polymerase chain reaction (qRT-PCR)

For mRNA extraction, cells were harvested in Trizol lysis reagent (Life Technologies) and lysed by 30 min vortex. RNA purification was performed using the ENZA total RNA Kit I (VWR) according to manufacturer instructions. For reverse transcription from mRNA to cDNA the Super Script III reverse transcriptase kit (Invitrogen) was applied and qRT-PCR analysis was performed on the CFX96 Touch Real-Time PCR Detection System (BioRad) using SsoFast EvaGreen Supermix (BioRad). Expression levels were normalized to the housekeeping gene glyceraldehyde 3-phosphate dehydrogenase (*GAPDH*) using BioRad software.

### qRT-PCR primer sequences:

*PARK2* forward primer: TTTCCCAGTGGAGGTCGATT  
*PARK2* reverse primer: CAAGAACGGCCGCCAAG  
*ACTB* forward primer: CTGGACTTCGAGCAAGAGATG  
*ACTB* reverse primer: GGAAATGAGGGCAGGACTTAG  
*GAPDH* forward primer: GAAATCCCATCACCATCTTCCAGG  
*GAPDH* reverse primer: GAGCCCCAGCCTTCTCCATG  
*OCT4* forward primer: AGTGAGAGGCAACCTGGAGA  
*OCT4* reverse primer: GTGAAGTGAGGGCTCCCATA  
*EN1* forward primer: GTGTCTGCCCACCTCTTCTC

*ENI* reverse primer: GCAGTCTGTGGGGTCGTATT  
*LMX1A* forward primer: AGAGCTCGCCTACCAGGTC  
*LMX1A* reverse primer: GAAGGAGGCCGAGGTGTC  
*GIRK2* forward primer: CCAGTCGGCTGGAATTGAGT  
*GIRK2* reverse primer: ATGAGAGTGGAGATGCCTGC

### **Desalting of mass spectrometry samples**

A small plug of C<sub>18</sub> material from a 3M Empore™ disk (Sigma) was inserted in the constricted end of a P200 pipette tip and 1.5 cm of the tip was packed with reversed-phase resin material consisting of a 1:1 mix of Poros 50 R2 (Applied Biosystems) and Oligo R3 (Applied Biosystems) dissolved in 100% acetonitrile (ACN, Sigma) by applying air pressure with a 1 ml syringe. The acidified samples were loaded onto the first micro-columns and washed with 0.1% TFA. The peptides were eluted using 60% ACN/0.1% TFA and the samples were dried by speed vacuum centrifugation.

### **Enrichment of phosphorylated peptides**

Peptides were dissolved in 80% ACN/5%TFA with 1 M glycolic acid (Sigma) and incubated with 0.6 mg titanium dioxide (TiO<sub>2</sub>) beads (Titansphere 10 µm, GL Sciences) per 100 µg peptide for 30 min at RT with vigorous shaking. The beads were centrifuged briefly and the supernatant transferred to a new tube with 0.3 mg TiO<sub>2</sub> beads per 100 µg peptide. After 15 min incubation at RT with vigorous shaking and a brief centrifugation the supernatant was collected. The beads were subsequently washed with 80% ACN/1% TFA and 10% ACN/0.1% TFA. The supernatant with the unbound TiO<sub>2</sub> fraction and the washing fractions, both containing the non-phosphorylated peptides, were combined. The phosphorylated peptides were eluted from the beads by incubation with 1.5% ammonium hydroxide solution (Sigma), pH 11.3, for 15 min at RT with vigorous shaking. The beads were spun down and the supernatant passed through C<sub>8</sub> material from a 3M Empore™ disk (Sigma) before the samples were dried.

All the eluates were dried and desalted on homemade columns as described previously, using only R3 material for the phosphorylated peptides and R2/R3 material for non-modified peptides.

### **Hydrophobic interaction liquid chromatography (HILIC) and high pH fractionation**

The non-modified sample was first diluted in 0.1% TFA and approximately 50 µg peptide was fractionated. All phosphorylated peptides were fractionated. The samples were dissolved in 90% ACN, 0.1% TFA (solvent B) and loaded onto an in-house packed TSKgel Amide-80 (Tosoh Bioscience) micro-capillary column (450 µm OD x 320 µm ID x 17 cm) using an Agilent 1200 Series HPLC (Agilent). Peptides were separated using a gradient from 100–60% solvent B (A = 0.1% TFA) running for 30 min at a flow-rate of 6 µl/min. Fractions were collected every 1 min and combined into 12-15 final fractions based on the UV chromatogram and subsequently dried by vacuum centrifugation.

### **Immunofluorescence staining**

Cells cultured in 24-well plates (Corning) containing coverslips were fixed for 15 min at room RT in 4% (w/v) paraformaldehyde (PFA, Sigma) in 0.15 M phosphate buffer (potassium dihydrogen phosphate (Merck) and disodium phosphate (Merck)), pH 7.4, and rinsed with 0.05 M Tris-Buffered Saline (TBS, Sigma), pH 7.4, with 0.1% Triton-X-100 (Sigma). Cells were permeabilised and unspecific binding blocked with TBS containing 10% goat- (Millipore), donkey- (Millipore) or sheep serum (Sigma) according to the host of the secondary antibodies, and incubated over night (ON) at 4 °C with primary antibodies diluted

in TBS/10% donkey or sheep serum. Cultures were rinsed in TBS/0.1% Triton-X-100 and incubated with Alexa Fluor 555 goat anti-rabbit IgG (Abcam #150078) or Alexa Fluor 488 goat anti-rabbit IgG (Invitrogen # A11008) 1:500 in TBS/10% goat serum for 2 h at RT. Cell nuclei were counterstained with 10  $\mu$ M 4',6-diamidino-2-phenylindole dihydrochloride (DAPI, Sigma) in TBS. Cultures were mounted onto glass slides with ProLong Diamond mounting medium (Molecular Probes).

### **Western blotting procedure**

Cell pellets were lysed in RIPA buffer (50 mM Tris-hydrochloride (Sigma), 150 mM sodium chloride (Sigma), 1% Tergitol-type NP-40 (Sigma), 0.5% sodium cholate hydrate (Sigma), and 0.1% SDS (Sigma), pH 8) containing phosphatase (PhosSTOP tablets, Roche) and protease inhibitor (Complete Tablets, Roche) and sonicated for 10 secs at 10 amplitude microns on ice. Protein concentrations were determined with bicinchoninic acid (BCA) protein assay (ThermoFisher) and equal amounts of protein from each sample were denatured for 5 min at 95 °C in 6X Laemmli buffer. Proteins were separated on a 4-15% precast gel (Biorad) at 200 V with running buffer (35 mM SDS, 250 mM Trizma base (Sigma), and 1,92 M glycine (Sigma), pH 8.3) and transferred to a polyvinylidene difluoride (PVDF) membrane (Biorad) at 25 V, 2.5 A for 11 min using the Trans-Blot Turbo Transfer System (Bio-Rad). MagicMark XP Western Protein Standard (ThermoFisher) and BLUeye Prestained Protein Ladder (Geneflow) were used to estimate the molecular weight of the proteins. Membranes were blocked for 2 hrs at RT in 5% (w/v) skim milk (Sigma) diluted in Tris-buffered saline (20 mM Tris-hydrochloride and 150 mM sodium chloride) with 0.1% Tween 20 (TBST, Sigma) with gentle shaking. Primary antibodies were diluted in 5% (w/v) skim milk in TBST and membranes incubated ON at 4 °C with gentle shaking.

Blots were washed four times with TBST and incubated with horseradish peroxidase (HRP)-conjugated goat anti-mouse or -rabbit IgG (Bio-Rad), diluted 1:5000 in 5% (w/v) skim milk in TBST, for one hr at RT with gentle shaking. After being washed, the membranes were imaged using ECL (Millipore) on a ChemiDoc Touch Imaging system (Bio-Rad), and the optical density of each band was quantified using Image Lab software (Bio-Rad). The protein expression level for each lane was normalized to the intensity of the corresponding  $\beta$ -actin band. Subsequently, the protein expression levels of *PARK2* KO cells were normalised to levels of the control in the same differentiation to obtain relative expression levels for each differentiation. For validation of proteomic results, relative protein expression levels were determined from at least 2-3 subsequent differentiations, independent from the ones used for the proteomic analysis.
